# Supplementary material
Source: publisher figshare collection journal article supplement (https://tandf.figshare.com/ndownloader/files/44610465)
Supplement: Supplementary file 1 [file 44610465]

**APPENDIX**

**Codes for Topics**

| **Code/Subject** | **Definition** | **Exemplars** |
| --- | --- | --- |
| Family | Any mention by Black women of COVID’S impact on immediate and extended family members, including children, spouses, etc. | “He [husband] died by himself,” said McGowan-Watts, who joined the call after an invitation on a Facebook support group for widowed Black women. “Not being able to see him, being able to touch him, all of those things. The grief is kind of complicated.” The women listening understood instantly. They were all widows of COVID-19. |
| Politics | Any mention by Black women of COVID-19 and the government, policy, or politics, and elections, the pandemics impact on governance or the government’s role in addressing the pandemic | Harris set an accusatory tone with her very first response, to a question about the COVID-19 pandemic. "The American people have witnessed the greatest failure of any presidential administration in the history of our country," she asserted.  But Harris had none of it, saying Trump and Pence had learned of the danger of COVID-19 in January but chose not to share that information with the public until the president did so in March. "They knew what was happening and they didn't tell you," Harris said. "They knew and they covered it up." |
| Economics | Any mention by Black women about COVID-19s impact on work, (un)employment, business, finances, small business, leadership abilities; the economic topic can be positive or negative | "Women of color are more likely to be breadwinners for their household" than white women, said Rebecca Dixon, executive director of the National Employment Law Project, which advocates for low-wage workers. |
| Arts, Entertainment, and Culture | Any mention by Black women of COVID-19’s effect on the arts, entertainment, and culture, including poetry, writing, movies and music and their ability to support the arts | I feel like I don't want to say. I don't want to give it away. But you know, we started this movie in January and when the COVID hit us, we felt like, "All right. Maybe we won't push to try to finish." Then George Floyd and Breonna [Taylor] happened and just all the other people who have been killed and the calling the cops on Black people, and we decided we had to get this done right now because we're in a space where white people are saying, "Yeah, I would hear Black people cry out, but I would never hear it." |
| Health Effects (Physical and Mental) | Any mention (including implied) by Black women of the positive and negative effects COVID-19 had on their physical health, including immune system, injuries, surgeries, and maternal health; Any mention by Black women on COVID’s effects on mental health, including depression, anxiety, stress or how they were managing mental health in the context of the pandemic | Brown-Olaseinde: They put me on oxygen, and two days later, the test came back confirming that I did have covid. I wasn't able to maintain the oxygen level that they needed me to maintain for the twins. They'd come in and check the twins every couple of hours. They wanted to put me on the CPAP machine, and the CPAP machine is really scary. When they put that on, I felt like I couldn't breathe. The doctor said, "Listen, you're going to go and get intubated," and I remember saying to him, "Please, just don't take the babies out. Please, let them mature more."  "In the midst of the pandemic and all of the protests and everything, I found myself not being able to concentrate on work," Ms. Tomlin says. "I had to take a week off." |
| Education | Any mention by Black women of COVID’s effects on educational institutions and their staff or learning; or any instance in which Black women are teaching others about COVID, vaccination, or being taught | "It's really tough. I feel as though it would be smarter for me to go to a community college and stay here in Jersey," Williams said. "If money wasn't an issue, if covid wasn't an issue, I would want to go to college." |
| JUSTICE | Any mention by Black women of COVID’s effects on social justice initiatives e.g. against racism, and initiatives for diversity, equity and inclusion, impact of law enforcement, crime problems and initiatives | Rhonda M. Smith, executive director of the California Black Health Network, said that disparities in vacation rates are further proof that "racism is a public health crisis." Inequities crop up in many health issues, including death rates from COVID-19 and also rates of maternal mortality, which are highest among Black women.  In Joshua Tree, while speaking frequently with the Richardson family, Bradley has taken isolation seriously, contemplating her next work. "When Covid hit and when the protests started happening, there was a real pull of me being asked to comment on the current moment, and I tried to…[say], you know, I'm just here in a place of support and observance," she explains. "The pause is actually what I think will allow me to contribute in a sincere way." |
| Other Topic | Any topic that does not seem to fit in the above topics listed |  |

**Codes for Frames**

| **Code/Subject** | **Definition** | **Exemplars** |
| --- | --- | --- |
| Strong Black woman | The quote contains a frame or is being used to create a frame where the Black woman is presented as inspirational, supportive, “strong”, “resilient,” “overcomer of obstacles,” an advocate for herself and others, “outspoken,” “not holding back,” “straightforward,” or as the protector of others, and like terms | In the end, she [Melany Anderson] estimated, she conducted about 70 percent of the mortgage application and approval process online. Her fees totaled $4,000, about half the national average. In November 2019, she and her daughter moved into a two-bedroom home not far from her parents with a modern kitchen, a deck and a backyard. "We adapted to the whole Covid thing in a much easier way than if we were still living with my parents," Ms. Anderson said this summer. "We had a sense of calm, made our own rules." |
| Angry Black woman | The quote contains a frame or is being used to create a frame where the Black woman is presented as, “screaming,” “taking an aggressive stand,” “belligerent” | Harris set an accusatory tone with her very first response, to a question about the COVID-19 pandemic. "The American people have witnessed the greatest failure of any presidential administration in the history of our country," she asserted. |
| Intersectional first frame | The quote contains a frame or is being used to create a frame where the Black woman is presented as an exception and the first to accomplish a major achievement; the frame emphasizes accomplishments | The first New Yorker to receive the vaccine - and potentially the first person in the United States since it was approved - was a Black woman, a nurse named Sandra Lindsay, who oversees five critical-care units at the Long Island Jewish Medical Center.  There at the medical center Monday morning, she rolled up her sleeve. As a doctor inserted the needle, Lindsay didn't flinch. The doctor asked how she felt. "I feel great," Lindsay said. She talked about hoping that this marked the beginning of the end of a nightmare. She talked about letting her own decisions be guided by science, and hoping others did the same. |
| Black Mother Frame | The quote contains a frame or is being used to create a frame where the Black woman is presented as a selfless matriarch, working to maintain the survival of her family and community | "Every little thing I say I'm doing, that I've decided is best for my daughter, there is this wave of backlash to the point where I've stopped telling people about my decisions," she said. "I'm Black, and online, people call me an elite racist because we formed a pod. I think it's just easier to scream racist because we don't want to address the fundamental issues." |
| Conflict Frame | The quote is being used to create a frame where the Black woman is presented in conflict with others, groups, or institutions; is in disagreement; reproaches an individual or group; refers to winners and losers; *or the quote is being used to create a frame of conflict present throughout the article.* | But Harris had none of it, saying Trump and Pence had learned of the danger of COVID-19 in January but chose not to share that information with the public until the president did so in March. "They knew what was happening and they didn't tell you," Harris said. "They knew and they covered it up." |
| Economic Consequences Frame | The quote includes a frame focused on the Black woman reporting an event, problem, or issue in terms of its economic consequences e.g., consequences of COVID on Black women; the quote mentions financial losses/expenses and/or gains in the present or future; or the quote mentions the economic or financial consequences of pursuing or not pursuing a course of action; *or the quote is being used to create a frame of economic consequences throughout the article.* | "Women of color are more likely to be breadwinners for their household" than white women, said Rebecca Dixon, executive director of the National Employment Law Project, which advocates for low-wage workers. |
| Morality Frame | The quote includes or presents a frame that presents COVID or the effects of the pandemic and actions of people in the context of religious tenets or moral prescriptions, what is right and wrong; the quote presents a moral message, e.g., a call for equity or justice; the quote may refer to morals, or God; or the quote offers social prescriptions about how to behave; if the actions and decisions, e.g., business and health decisions of the Black woman benefited the community and lives of others. *Or the quote is being used to create a moral frame throughout the larger article.* | [Sandra] Lindsay emphasized the symbolic importance that she was the first American to receive the vaccine — as a Black woman, she is among the demographic most disproportionately devastated by COVID-19. African Americans also have long been subjected to unethical medical research, raising some concern that they may be more hesitant to take the vaccine. “I want people who look like me and are associated with me to know it’s safe,” she said. “Use me as an example. I would not steer the public wrong.” |
| Attribution frame | The quote includes a frame in which the Black woman attributes responsibility for COVID-19 or its effects, or the cause and solution to either the government, or a group e.g., the public/society/organization, or a concept e.g., racism, sexism; the quote suggests that the group can alleviate the problem which may be urgent. *Or the quote is being used to create a frame of attribution throughout the larger article.* | "There is a natural human tendency to want to blame it on someone else when this is truly a systemic problem," said Prudence Carter, dean of the Graduate School of Education at the University of California, Berkeley. "Parents are trying to do the best they can to survive and take care of their own personal situation because we really don't have a government or leadership right now that's trying to coordinate this across the nation." |
| Other Frame | Any topic that does not seem to fit in the above topics listed |  |

**Types of Sources**

| **Code/Subject** | **Definition** | **Exemplars** |
| --- | --- | --- |
| Expert | This is quote by a Black woman who is professional in her field; who is a specialist and skilled in her field e.g., a CDC researcher and a business owner and if she is quoted in that role; note that her expertise may be mentioned elsewhere in the article and not necessarily by the direct quote | Dr. Molina, an emergency medicine resident at Brigham and Women's Hospital and one of the paper's authors, said that spotlighting diversity in medicine was particularly important amid a pandemic that disproportionately impacts Black patients. ''The Covid pandemic has served to emphasize health disparities and how they impact Black populations,'' she said. |
| Lay Source | This is a quote by a Black woman who has experiences with the topic at hand, but who is not an expert and who is included in the story to provide perspective e.g., a protester or a patient; note that her perspective may be mentioned elsewhere in the article and not necessarily by the direct quote | Sitting in the vaccine site’s observation area Thursday, West said she was glad she had listened. “When I get home,” she said, “I’m going to text all my friends and tell them to go get the shot.” |
| Government | This is a quote by a Black woman who works at some level of the government system; note that her position may be mentioned elsewhere in the article and not necessarily by the direct quote; this position must be focused on governance e.g., a council woman and not an employee of a government agency | Vickie Tonkins, the chairwoman of the El Paso County Republican Party in Colorado, weighed throwing an election-night party in a hotel ballroom, but Covid-19 guidelines imposed by the governor made the plan too expensive. "It is disappointing because we are anticipating great victories here," she said. "It is what it is." |
